# Supplementary material for: Ni3Se4/Fe(PO3)2/NF composites as high-efficiency electrocatalysts with a low overpotential for the oxygen evolution reaction
Source: Royal Society of Chemistry journal article supplement (doi:10.1039/d3ta06875g), 2023-12-15
Supplement: d3ta06875g1.pdf [file d3ta06875g1.pdf]

## Supporting Information

### $\text{Ni}_3\text{Se}_4/\text{Fe}(\text{PO}_3)_2/\text{NF}$ Composites as high-efficiency electrocatalysts with a low overpotential for the oxygen evolution reaction

Ting-Yu Shuai, Qi-Ni Zhan, Hui-Min Xu, Chen-Jin Huang, Zhi-Jie Zhang, Hong-Rui Zhu, Gao-Ren Li\*

*College of Materials Science and Engineering, Sichuan University, Chengdu 610065, China*

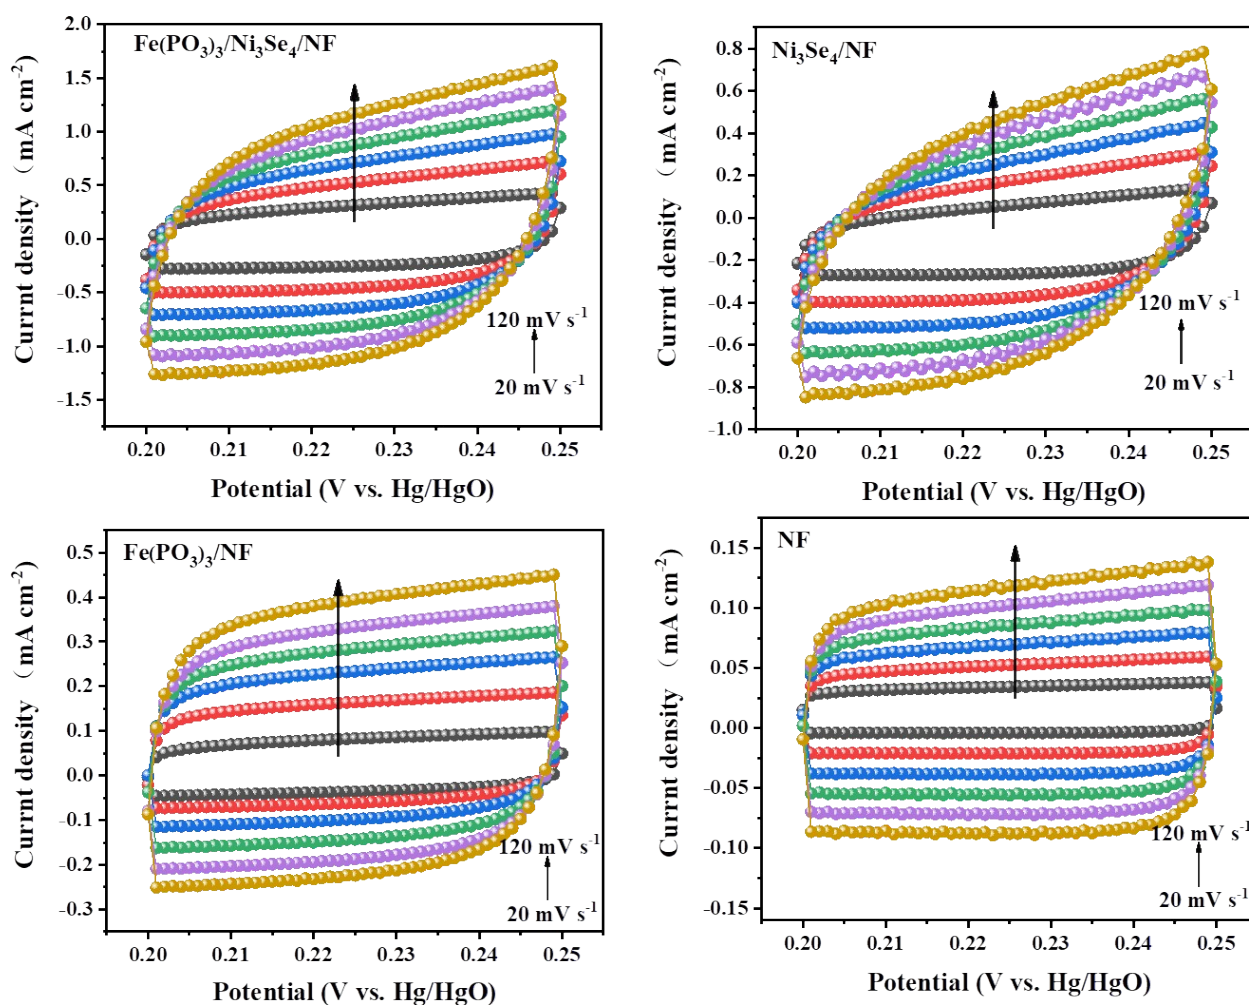

**Fig. S1** CVs of (a)  $\text{Ni}_3\text{Se}_4/\text{Fe}(\text{PO}_3)_2/\text{NF}$ , (b)  $\text{Ni}_3\text{Se}_4/\text{NF}$ , (c)  $\text{Fe}(\text{PO}_3)_2/\text{NF}$ , (d) NF from 20 to 120 mV S<sup>-1</sup>.

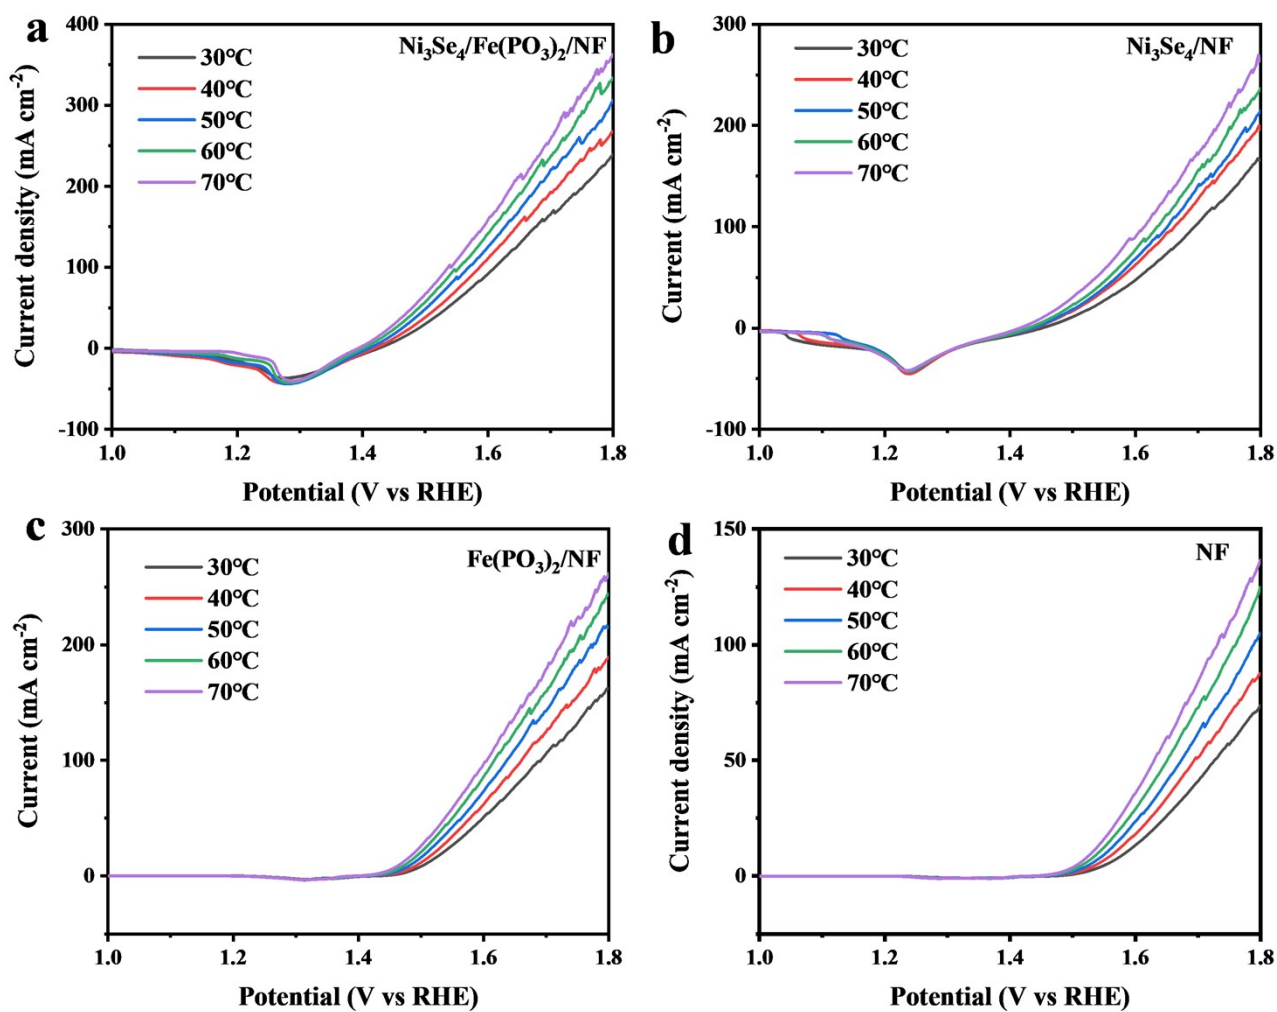

**Fig. S2** Polarization curves of (a) Ni<sub>3</sub>Se<sub>4</sub>/Fe(PO<sub>3</sub>)<sub>2</sub>/NF, (b) Ni<sub>3</sub>Se<sub>4</sub>/NF, (c) Fe(PO<sub>3</sub>)<sub>2</sub>/NF, (d) NF at different temperatures without IR compensation.

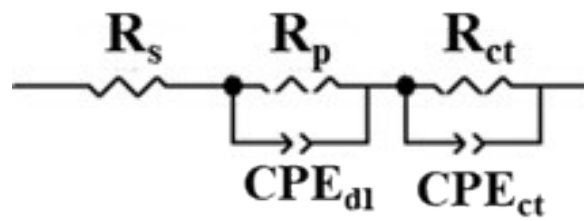

**Fig. S3** The equivalent circuit model for electrochemical impedance spectrum fitting.

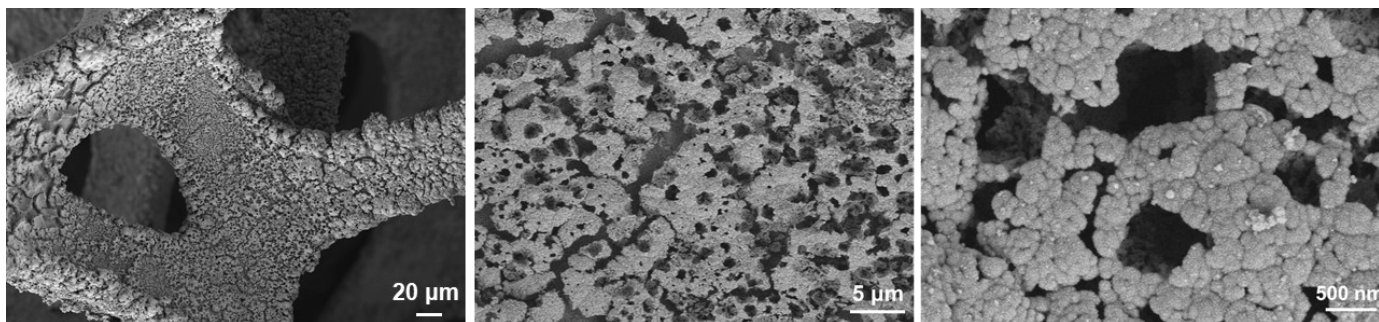

**Fig. S4** SEM images of Ni<sub>3</sub>Se<sub>4</sub>/NF with different magnifications.

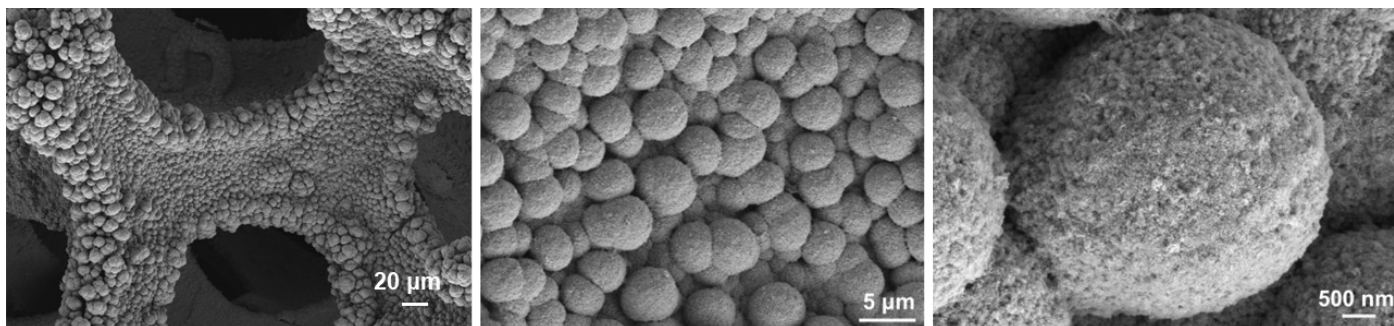

**Fig. S5** SEM images of Fe(PO<sub>3</sub>)<sub>3</sub>/NF with different magnifications.

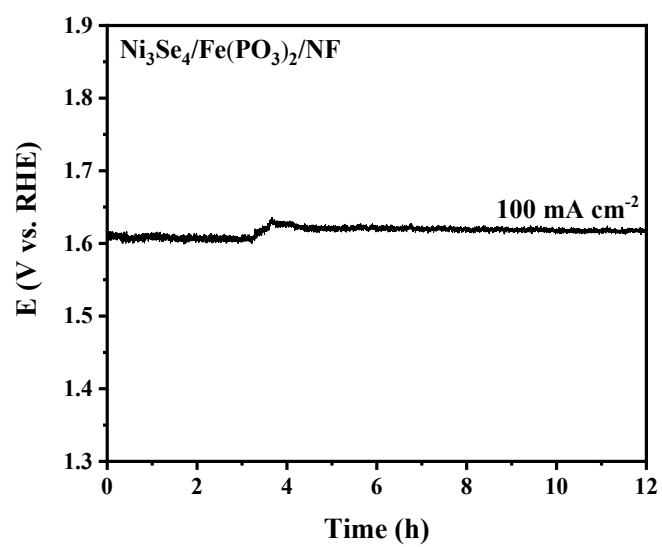

**Fig. S6** Stability test of  $\text{Ni}_3\text{Se}_4/\text{Fe}(\text{PO}_3)_3/\text{NF}$  at the current density of  $100 \text{ mA cm}^{-2}$  for 12 h without IR compensation.

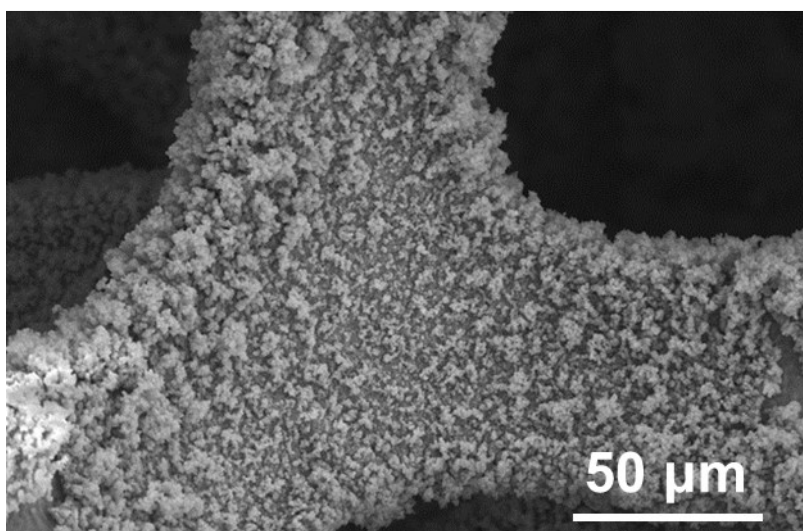

**Fig. S7** SEM images of Ni<sub>3</sub>Se<sub>4</sub>/Fe(PO<sub>3</sub>)<sub>3</sub>/NF after 12 h OER stability test at a constant current density of 10 mA cm<sup>-2</sup> (the NF skeleton structure was not destroyed).

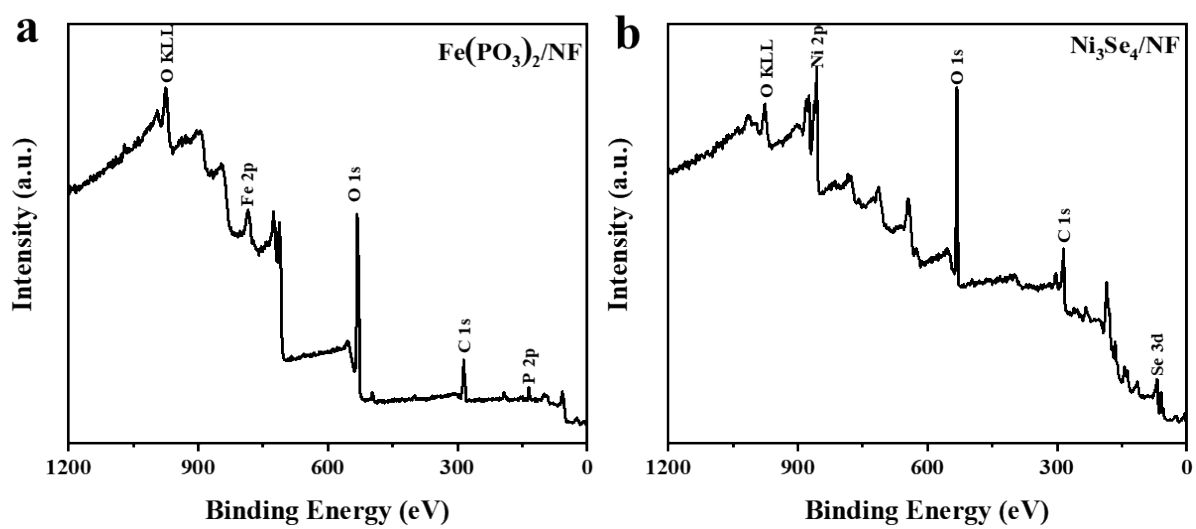

**Fig. S8** XPS elemental survey spectra of (a)  $\text{Fe}(\text{PO}_3)_2/\text{NF}$  and (b)  $\text{Ni}_3\text{Se}_4/\text{NF}$  samples.



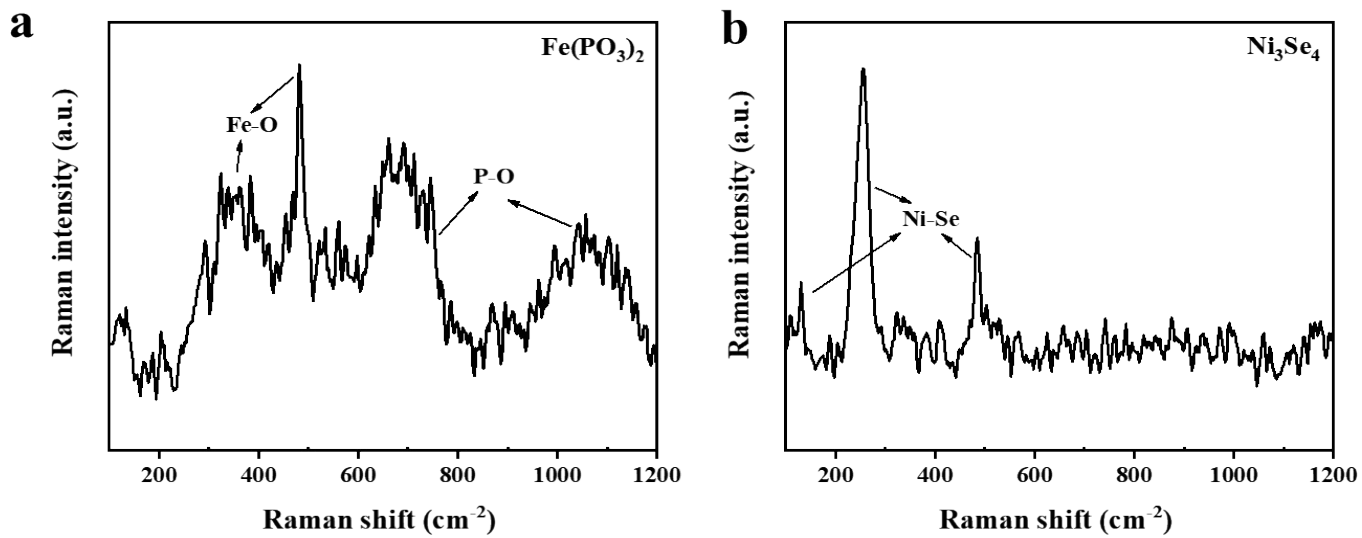

**Fig. S9** Raman shift curves of (a)  $\text{Fe}(\text{PO}_3)_2$  and (b)  $\text{Ni}_3\text{Se}_4$  samples.

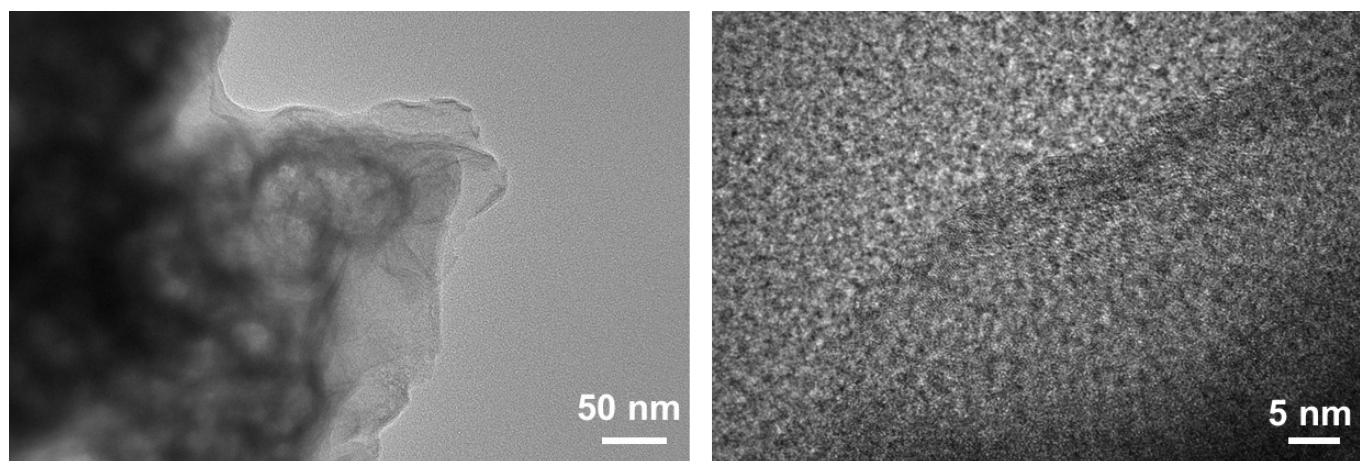

**Fig. S10** TEM images of polycrystalline region of  $\text{Ni}_3\text{Se}_4/\text{Fe}(\text{PO}_3)_2/\text{NF}$  with different magnifications.

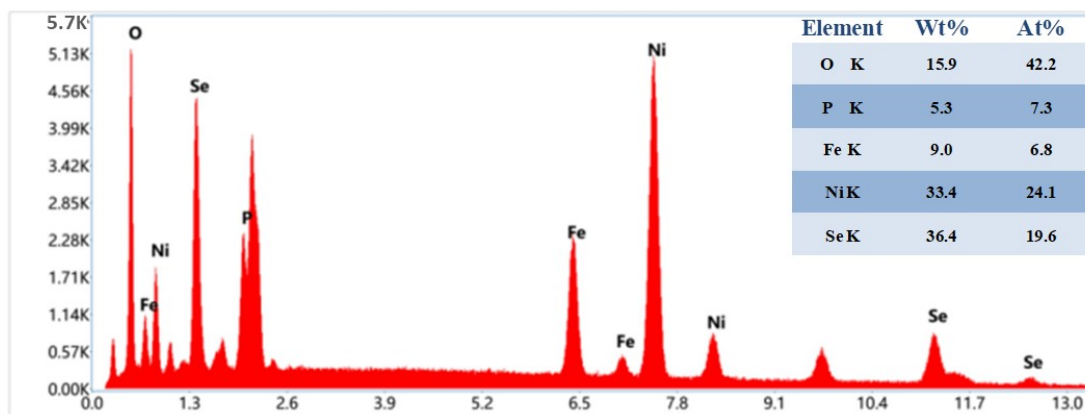

**Fig. S11** EDS pattern of the  $\text{Ni}_3\text{Se}_4/\text{Fe}(\text{PO}_3)_2/\text{NF}$ .

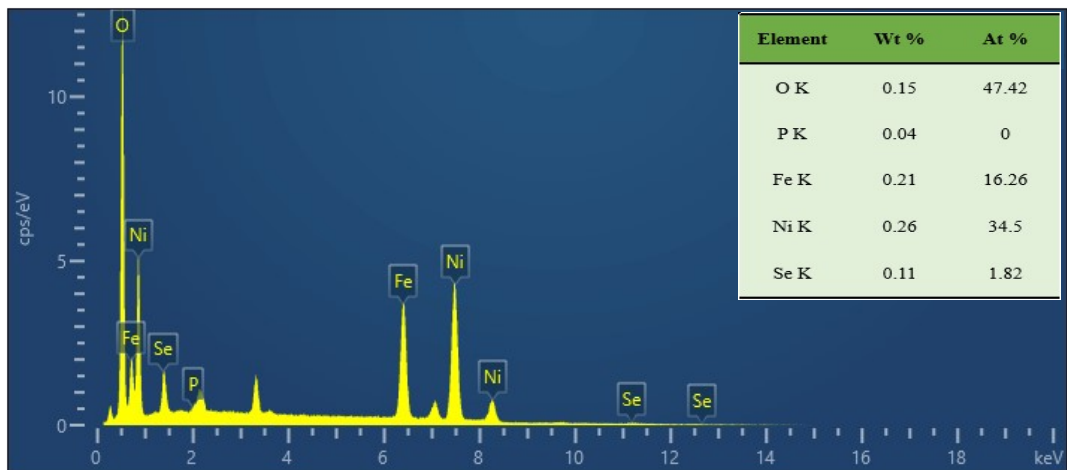

**Fig. S12** EDS pattern of the  $\text{Ni}_3\text{Se}_4/\text{Fe}(\text{PO}_3)_2/\text{NF}$  after 12 h stability test at  $10 \text{ mA cm}^{-2}$ .

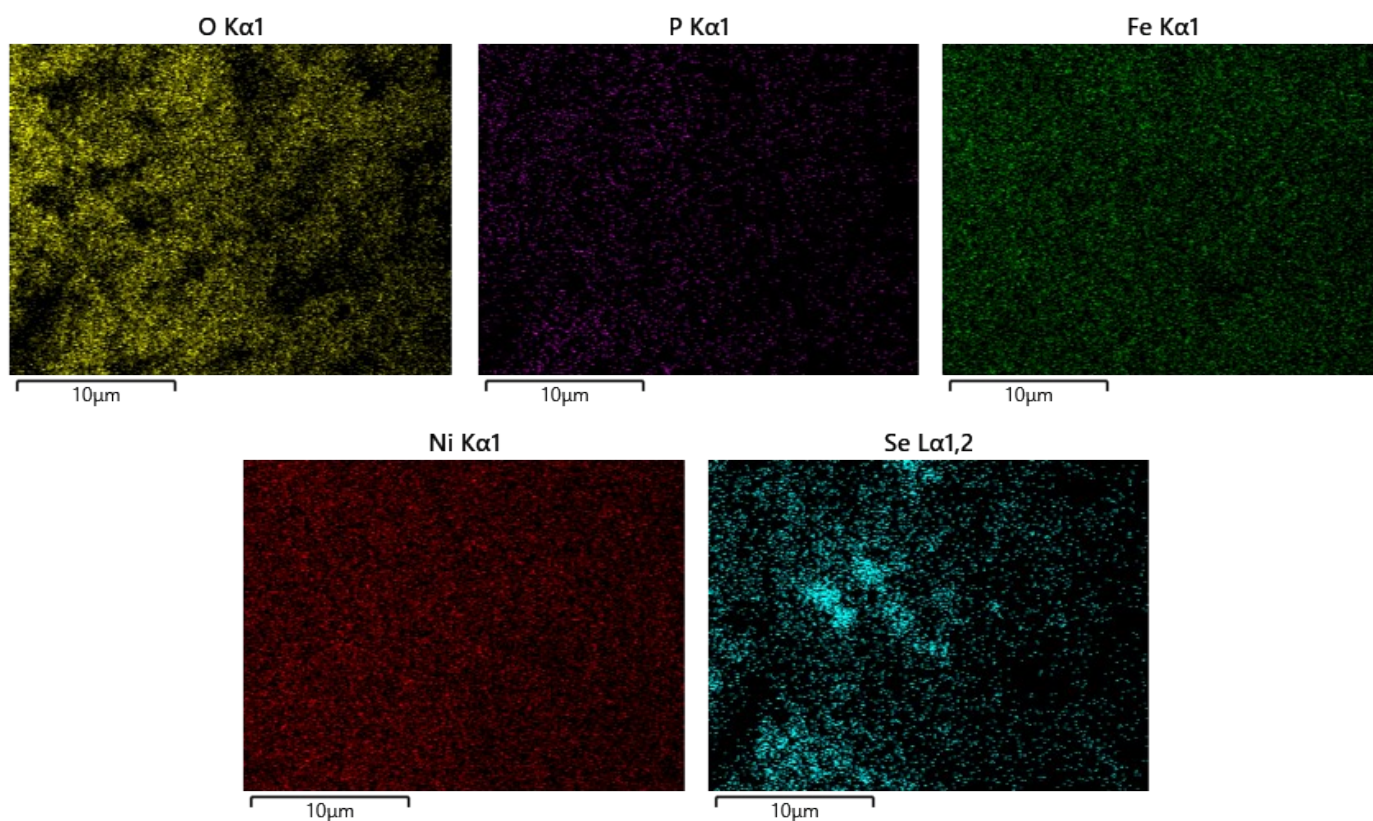

**Fig. S13** EDS mappings of Ni, Fe, Se, P in  $\text{Ni}_3\text{Se}_4/\text{Fe}(\text{PO}_3)_2/\text{NF}$  after 12 h stability test at  $10 \text{ mA cm}^{-2}$ .

**Table S1.** Summary of EIS fitting results of different catalysts for OER in 1.0 M KOH.

| Electrocatalyst                                                        | $R_s(\Omega)$ | $R_{ct}(\Omega)$ | $R_p(\Omega)$ |
|------------------------------------------------------------------------|---------------|------------------|---------------|
| Ni <sub>3</sub> Se <sub>4</sub> /Fe(PO <sub>3</sub> ) <sub>2</sub> /NF | 1.408         | 2.283            | 0.42865       |
| Ni <sub>3</sub> Se <sub>4</sub> /NF                                    | 1.084         | 6.602            | 0.57529       |
| Fe(PO <sub>3</sub> ) <sub>2</sub> /NF                                  | 1.298         | 9.664            | 0.40404       |
| NF                                                                     | 1.318         | 44.65            | 1.724         |

**Table S2.** BET surface areas, average pore sizes (adsorption) and total pore volumes of various samples.

| Sample ID                                                          | BET surface area (m <sup>2</sup> g <sup>-1</sup> ) | Average pore size (nm) | Pore volume (cm <sup>3</sup> g <sup>-1</sup> ) |
|--------------------------------------------------------------------|----------------------------------------------------|------------------------|------------------------------------------------|
| Ni <sub>3</sub> Se <sub>4</sub> /Fe(PO <sub>3</sub> ) <sub>2</sub> | 76.765                                             | 3.2506                 | 0.076405                                       |
| Ni <sub>3</sub> Se <sub>4</sub>                                    | 25.5082                                            | 7.5142                 | 0.065105                                       |
| Fe(PO <sub>3</sub> ) <sub>2</sub>                                  | 17.312                                             | 9.7661                 | 0.052543                                       |

**Table S3.** The mass and molar ratio of Se and P in Ni<sub>3</sub>Se<sub>4</sub>/Fe(PO<sub>3</sub>)<sub>2</sub>/NF analyzed by ICP-OES.

| Element | mass ratio | molar ratio |
|---------|------------|-------------|
| Se      | 24.4%      | 28.4%       |
| P       | 3.2%       | 10.4%       |

**Table S4.** Summary of Electrochemical double-layer capacitance ( $C_{dl}$ ) and ECSA of different samples.

| Sample                                                                 | $C_{dl}$ (mF cm <sup>-2</sup> ) | ECSA (cm <sup>2</sup> ) |
|------------------------------------------------------------------------|---------------------------------|-------------------------|
| Ni <sub>3</sub> Se <sub>4</sub> /Fe(PO <sub>3</sub> ) <sub>2</sub> /NF | 8.5                             | 212.5                   |
| Ni <sub>3</sub> Se <sub>4</sub> /NF                                    | 4.3                             | 107.5                   |
| Fe(PO <sub>3</sub> ) <sub>2</sub> /NF                                  | 2.5                             | 62.5                    |
| NF                                                                     | 0.8                             | 20.0                    |



**Table S5.** Comparisons of the electrocatalytic performance of NiFe-based catalysts for OER in 1.0 M KOH.

| Electrocatalyst                                                        | Overpotential (mV)  | Tafel slope (mV dec <sup>-1</sup> ) | Ref       |
|------------------------------------------------------------------------|---------------------|-------------------------------------|-----------|
| Ni <sub>3</sub> Se <sub>4</sub> /Fe(PO <sub>3</sub> ) <sub>2</sub> /NF | 185( $\eta_{10}$ )  | 30.4                                | This work |
| (Ni,Fe) <sub>3</sub> Se <sub>4</sub>                                   | 225( $\eta_{10}$ )  | 41                                  | 1         |
| Ni <sub>3</sub> Se <sub>4</sub> /FeOOH                                 | 249( $\eta_{10}$ )  | 46                                  | 2         |
| Ni <sub>3</sub> Se <sub>4</sub> /NiFe LDH/CFC                          | 223( $\eta_{10}$ )  | 55.5                                | 3         |
| Fe(PO <sub>3</sub> ) <sub>2</sub> /Ni <sub>2</sub> P/NF                | 177( $\eta_{10}$ )  | 51.9                                | 4         |
| CCS-NiFeP-10                                                           | 201( $\eta_{10}$ )  | 41.2                                | 5         |
| Fe-18h/NF                                                              | 220( $\eta_{10}$ )  | 45.2                                | 6         |
| Fe-Ni <sub>2</sub> P@C/NF                                              | 255( $\eta_{200}$ ) | 64                                  | 7         |
| Fe-Ni <sub>3</sub> S <sub>2</sub>                                      | 290( $\eta_{100}$ ) | 46.9                                | 8         |
| FeCoNiS/NF                                                             | 164( $\eta_{10}$ )  | 23.2                                | 9         |
| Fe-Ni <sub>5</sub> P <sub>4</sub> /NiFeOH-350                          | 221( $\eta_{10}$ )  | 35.0                                | 10        |
| Ni/Fe-MI/OH                                                            | 229( $\eta_{10}$ )  | 30.0                                | 11        |
| Ni <sub>3</sub> S <sub>2</sub> /MIL-53(Fe)                             | 214( $\eta_{10}$ )  | 33.8                                | 12        |
| d-NiFe-LDH                                                             | 230( $\eta_{10}$ )  | 77.0                                | 13        |
| NiFe-LDH/NiS/NF                                                        | 230( $\eta_{10}$ )  | 60.1                                | 14        |
| Ni <sub>3</sub> S <sub>2</sub> @Fe-NiP <sub>x</sub> /NF                | 240( $\eta_{100}$ ) | 46.5                                | 15        |
| Fe-NiO/NiS <sub>2</sub>                                                | 270( $\eta_{10}$ )  | 40                                  | 16        |

## References

- 1 J. Du, Z. Zou, C. Liu and C. Xu, *Nanoscale*, 2018, **10**, 5163-5170.
- 2 L. Lv, Y. Chang, X. Ao, Z. Li, J. Li, Y. Wu, X. Xue, Y. Cao, G. Hong and C. Wang, *Mater. Today Energy*, 2020, **17**, 100462.
- 3 T. Zhang, L. Hang, Y. Sun, D. Men, X. Li, L. Wen, X. Lyu and Y. Li, *Nanoscale Horiz.*, 2019, **4**, 1132-1138.
- 4 H. Zhou, F. Yu, J. Sun, R. He, S. Chen, C. Chu and Z. Ren, *Proc. Natl. Acad. Sci. U. S. A.*, 2017, **114**, 5607-5611.
- 5 S. Li, L. Wang, H. Su, A. N. Hong, Y. Wang, H. Yang, L. Ge, W. Song, J. Liu, T. Ma, X. Bu and P. Feng, *Adv. Funct. Mater.*, 2022, **32**, 2200733.
- 6 N. K. Shrestha, S. A. Patil, J. Han, S. Cho, A. I. Inamdar, H. Kim and H. Im, *J. Mater. Chem. A*, 2022, **10**, 8989-9000.
- 7 D. Li, Z. Li, R. Zou, G. Shi, Y. Huang, W. Yang, W. Yang, C. Liu and X. Peng, *Appl. Catal. B: Environ.*, 2022, **307**, 121170.
- 8 D. Li, W. Wan, Z. Wang, H. Wu, S. Wu, T. Jiang, G. Cai, C. Jiang and F. Ren, *Adv. Energy Mater.*, 2022, **12**, 2201913.
- 9 Y. Huang, L. Jiang, H. Liu and J. Wang, *Chem. Eng. J.*, 2022, **441**, 136121.
- 10 C. Li, J. Zhao, L. Xie, J. Wu and G. Li, *Appl. Catal. B: Environ.*, 2021, **291**, 119987.
- 11 W. Huang, C. Chen, Z. Ling, J. Li, L. Qu, J. Zhu, W. Yang, M. Wang, K. A. Owusu, L. Qin, L. Zhou and L. Mai, *Chem. Eng. J.*, 2021, **405**, 126959.
- 12 F. Wu, X. Guo, Q. Wang, S. Lu, J. Wang, Y. Hu, G. Hao, Q. Li, M. Yang and W. Jiang, *J. Mater. Chem. A*, 2020, **8**, 14574-14582.
- 13 Y. Wu, J. Yang, T. Tu, W. Li, P. Zhang, Y. Zhou, J. Li, J. Li and S. Sun, *Angew. Chem. Int. Edit.*, 2021, **60**, 26829-26836.
- 14 Q. Wen, K. Yang, D. Huang, G. Cheng, X. Ai, Y. Liu, J. Fang, H. Li, L. Yu and T. Zhai, *Adv. Energy Mater.*, 2021, **11**, 2102353.
- 15 X. Luo, P. Ji, P. Wang, X. Tan, L. Chen and S. Mu, *Adv. Sci.*, 2022, **9**, 2104846.
- 16 N. Zhang, Y. Hu, L. An, Q. Li, J. Yin, J. Li, R. Yang, M. Lu, S. Zhang, P. Xi and C. Yan, *Angew. Chem. Int. Edit.*, 2022, **61**, e202207217.
